# Supplementary material for: Efficient titanium nitride/titanium oxide composite photoanodes for dye-sensitized solar cells and water splitting
Source: Royal Society of Chemistry journal article supplement (doi:10.1039/c4ta05606j), 2015-01-01
Supplement: c4ta05606j1.pdf [file c4ta05606j1.pdf]

## Electronic Supplementary Information

### Efficient Titanium Nitride/Titanium Oxide Composite Photoanodes for Dye-Sensitized Solar Cells and Water Splitting

Chun-Ting Li,<sup>a</sup> Sie-Rong Li,<sup>b</sup> Ling-Yu Chang,<sup>c</sup> Chuan-Pei Lee,<sup>a</sup> Pei-Yu Chen,<sup>a</sup> Shih-Sheng Sun,<sup>b,\*</sup> Jiang-Jen Lin,<sup>c,\*</sup> R. Vittal,<sup>a</sup> and Kuo-Chuan Ho<sup>a,c,\*</sup>

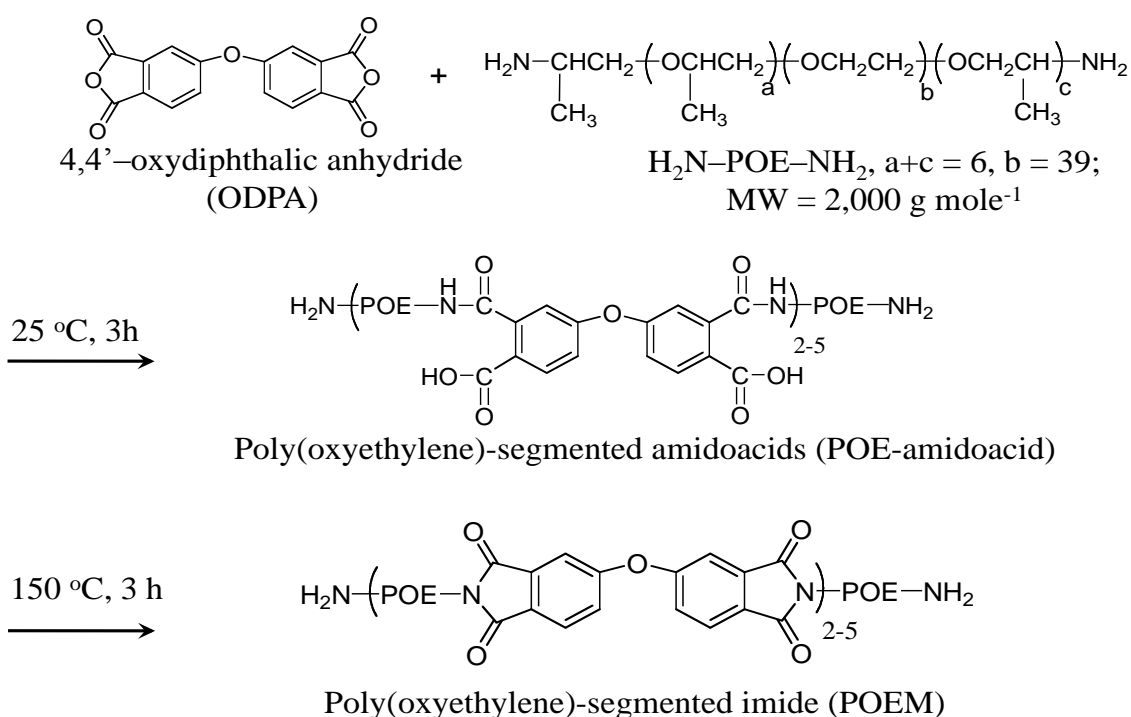

**Scheme S1.** Synthetic procedure for poly(oxyethylene)-segmented amide-imide (POE-amide-imide) (POEM)<sup>1,2</sup>.

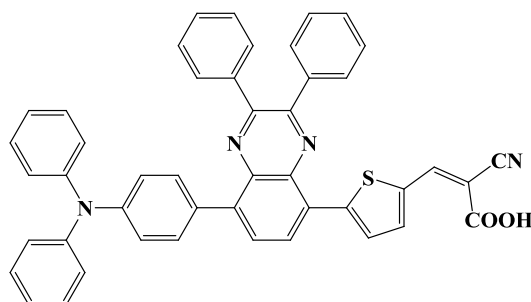

**Scheme S2.** Molecular structure of CR147 dye<sup>3,4</sup>.

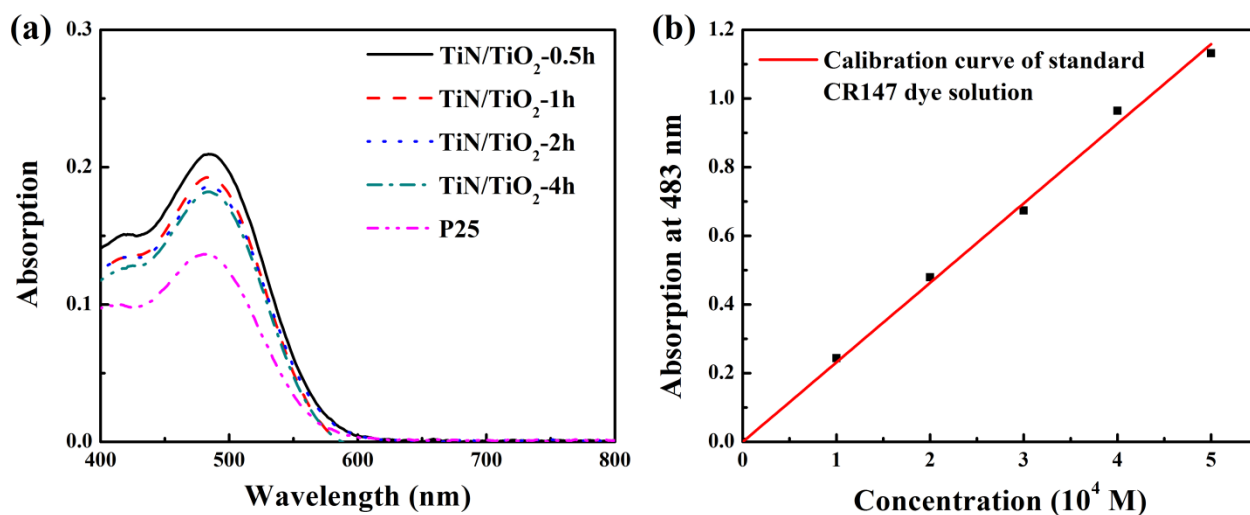

**Figure S1.** (a) Absorption spectra of the residual CR147 dye solutions after removing the dye-adsorbed films, and (b) a calibration curve of standard CR147 solution.

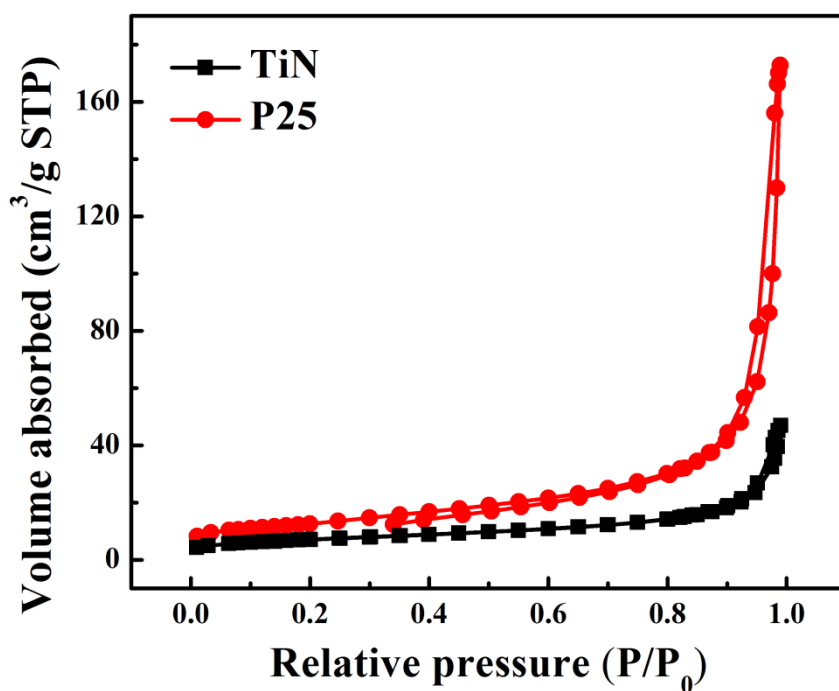

**Figure S2.** Brunauer–Emmett–Teller absorption/desorption curves of TiN and P25 nanoparticles.

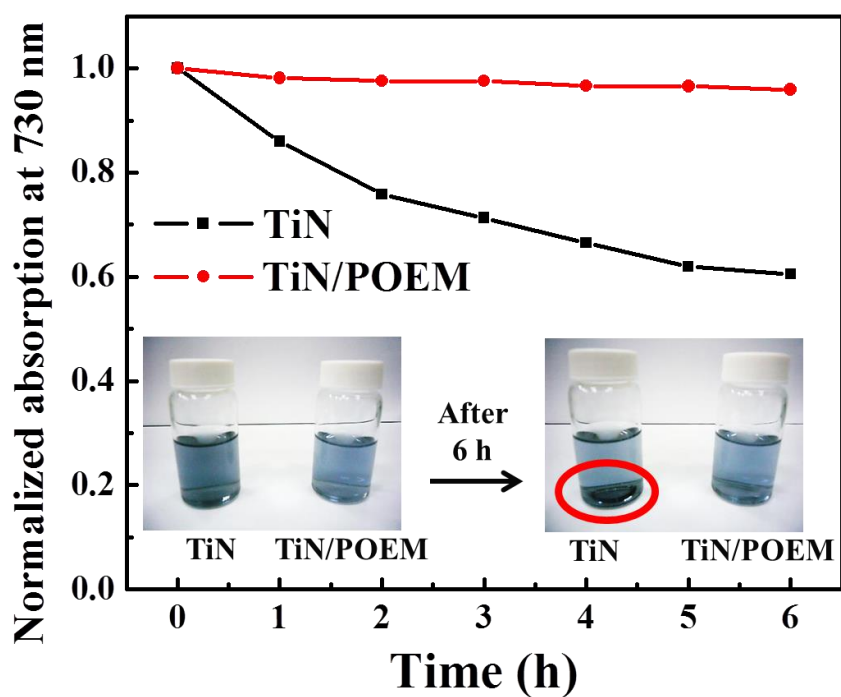

**Figure S3.** Plots of normalized absorption versus time at 730 nm for the aqueous solutions of TiN and TiN/POEM. The inserted photographic images show both aqueous solutions at 0 h and at 6 h separately.

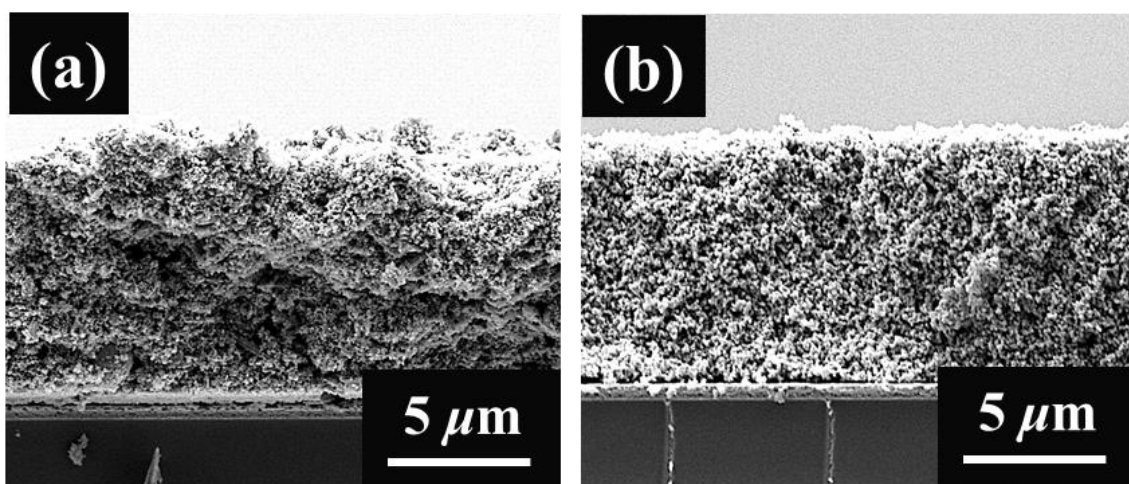

**Figure S4.** Cross-sectional FE-SEM images of (a) a TiN/TiO<sub>2</sub> composite film and (b) the P25 film.

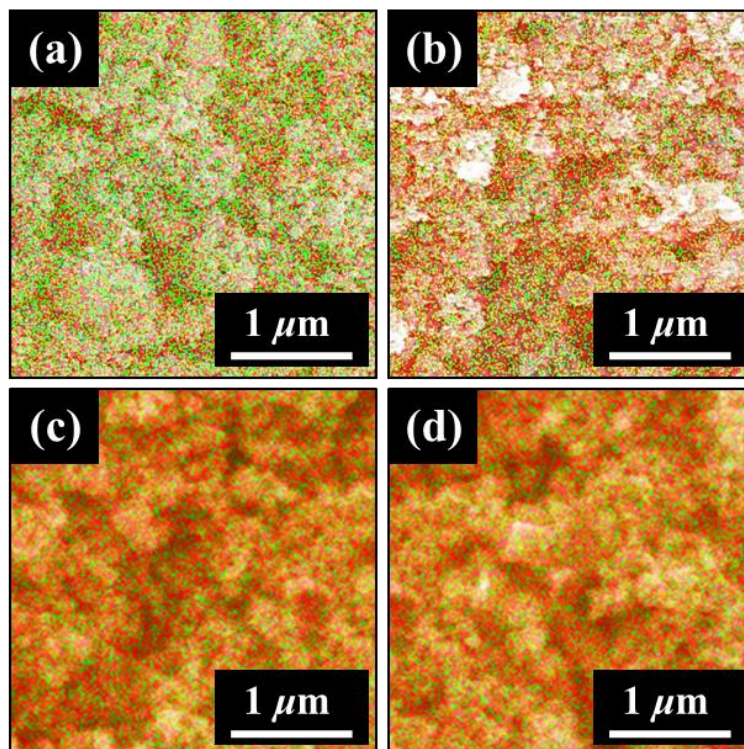

**Figure S5.** Elemental mapping images of films of (a) TiN/TiO<sub>2</sub>-0.5h, (b) TiN/TiO<sub>2</sub>-1h, (c) TiN/TiO<sub>2</sub>-2h, and (d) TiN/TiO<sub>2</sub>-4h; the red dots represent the signals of oxygen element, while the green dots represent the signals of nitrogen element.

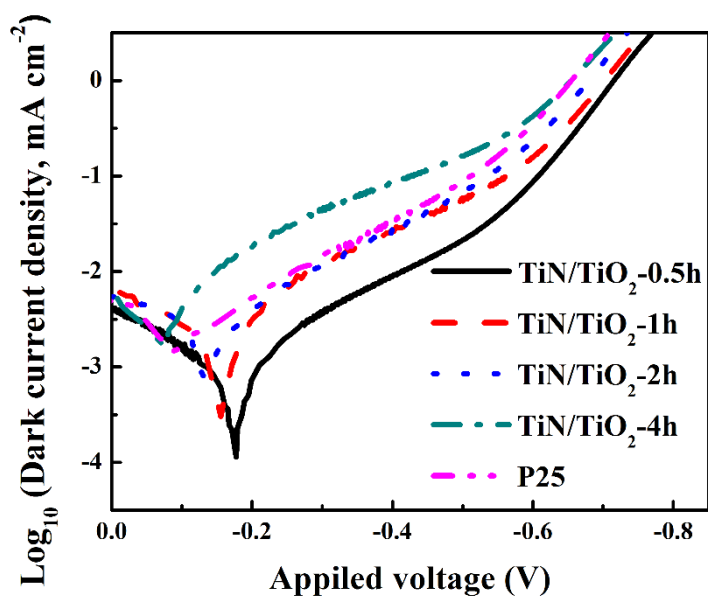

**Figure S6.** Logarithmic dark current density vs. applied voltage for the DSSCs with different photoanodes, measured at dark condition.

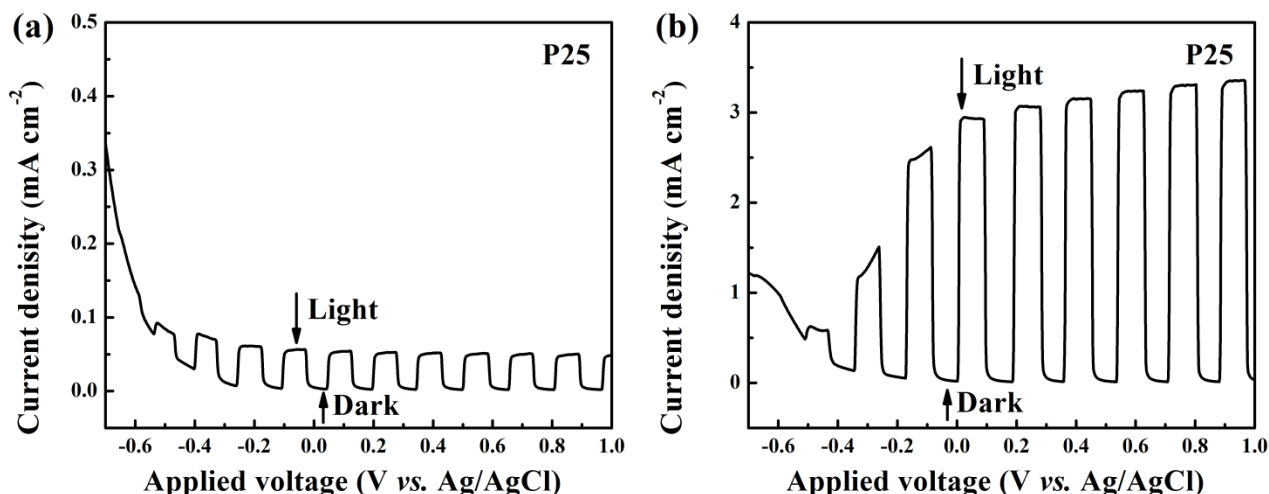

**Figure S7.** Photo-induced current density–voltage curves for the electrochemical water splitting devices with P25 photoanode, measured under (a) 100 mW cm<sup>-2</sup> (AM 1.5G) and (b) ultraviolet (UV) light illumination.

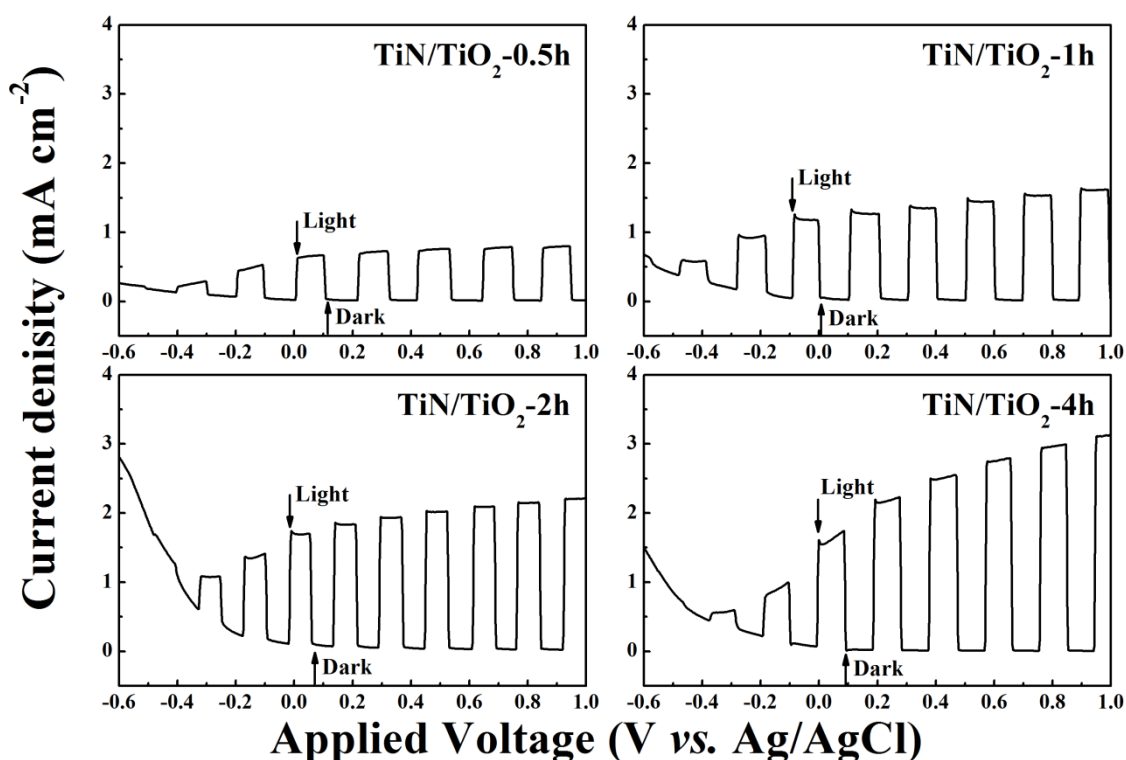

**Figure S8.** Photo-induced current density–voltage curves for the electrochemical water splitting devices with various TiN/TiO<sub>2</sub> composite photoanodes, measured under ultraviolet (UV) light illumination.

## Reference

1. R. X. Dong, S. Y. Shen, H. W. Chen, C. C. Wang, P. T. Shih, C. T. Liu, R. Vittal, J. J. Lin and K. C. Ho, *J. Mater. Chem. A*, 2013, 1, 8471.
2. L. Y. Chang, C. P. Lee, K. C. Huang, Y. C. Wang, M. H. Yeh, J. J. Lin and K. C. Ho, *J. Mater. Chem.*, 2012, 22, 3185.
3. S. R. Li, C. P. Lee, H. T. Kuo, K. C. Ho and S. S. Sun, *Chem. Eur. J.*, 2012, 18, 12085.
4. S. R. Li, C. P. Lee, C. W. Liao, W. L. Su, C. T. Li, K. C. Ho and S. S. Sun, *Tetrahedron*, 2014, 70, 6276.
